# Supplementary material for: Spatial and temporal variability in coccolithophore abundance anddistribution in the NW Iberian coastal upwelling system
Source: Copernicus journal article supplement (doi:10.5194/bg-2017-236), 2017-07-03
Supplement: Supplementary file 1 [file bg-2017-236-supplement.pdf]

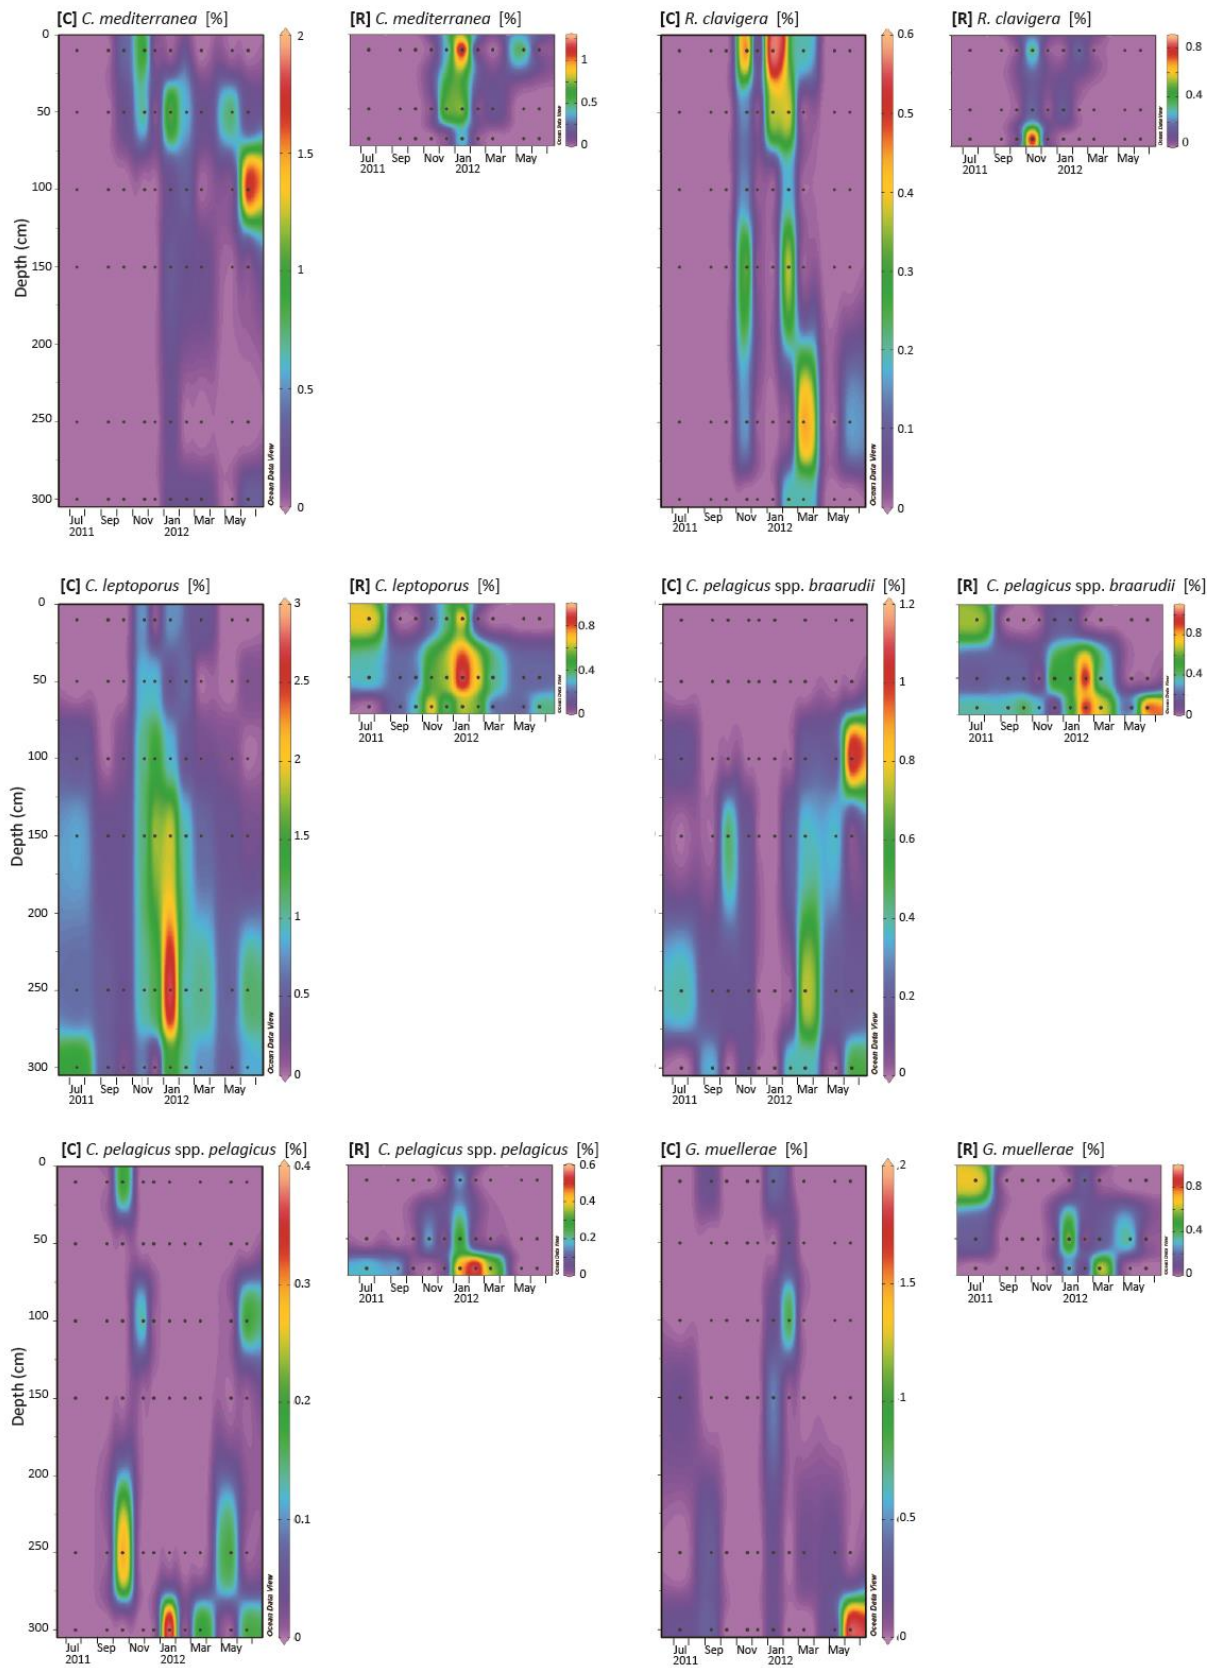

**Figure S1. Temporal and vertical variability of the relative abundance of minor species of coccoliths (%) in CALIBERIA (indicated by [C]) and in RAIJA (indicated by [R]) stations. Black dots represent the sampling month and depth. Note that each color bar has been scaled to the maximum and minimum values of its corresponding species.**

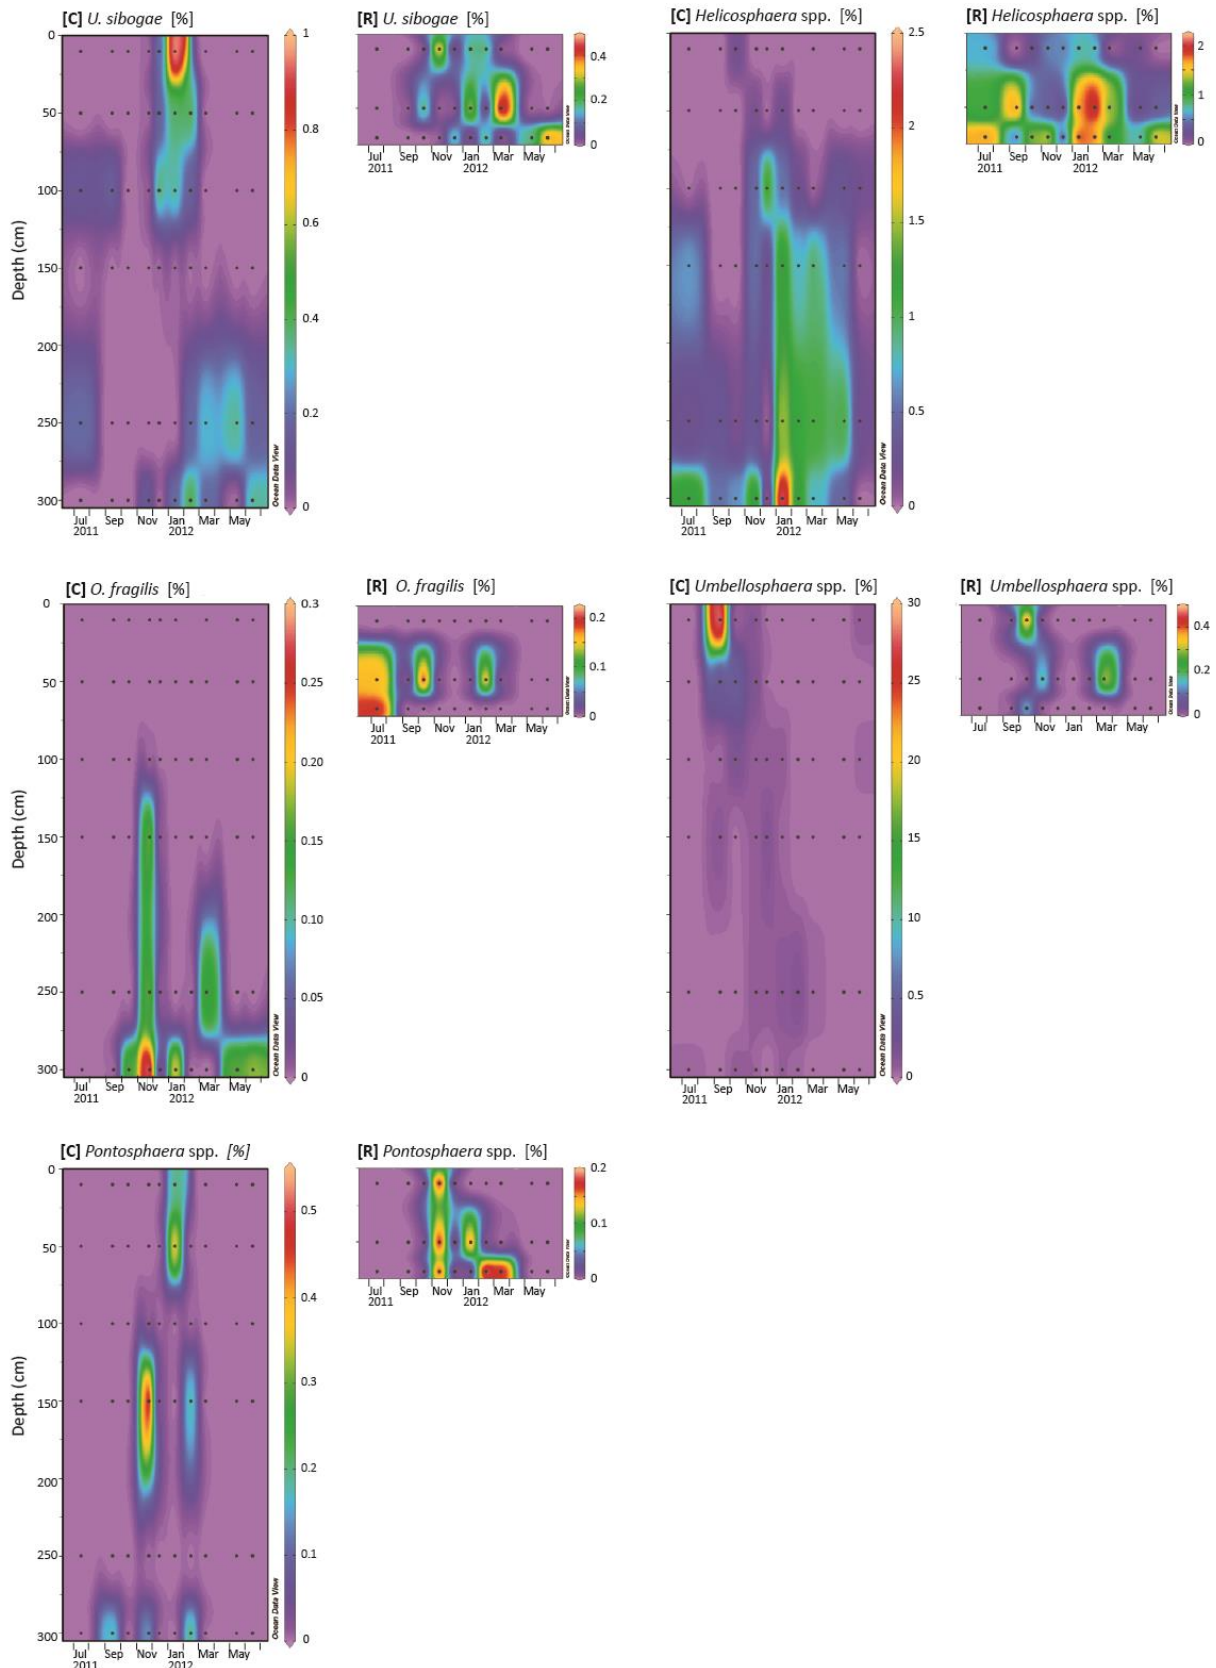

**Figure S2.** Temporal and vertical variability of the relative abundance of minor species of coccoliths (%) as in Figure S1.

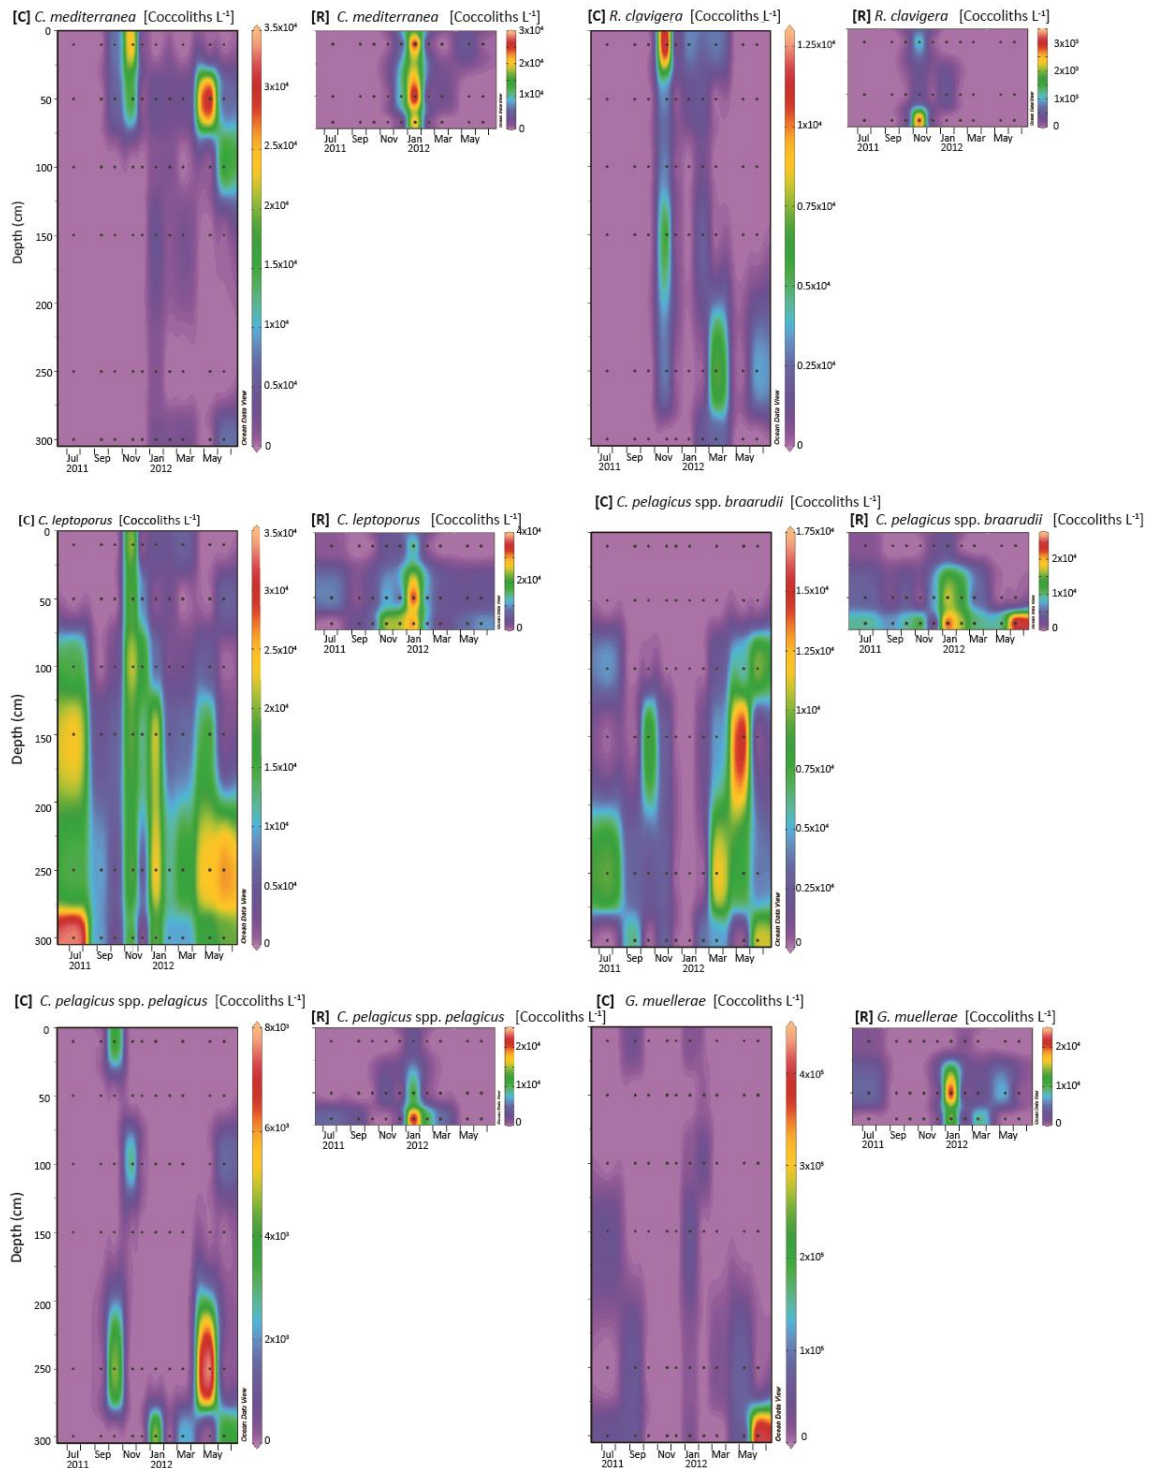

**Figure S3. Temporal and vertical variability of the absolute abundance of minor species of coccoliths (coccoliths  $L^{-1}$ ) as in Figure S1.**

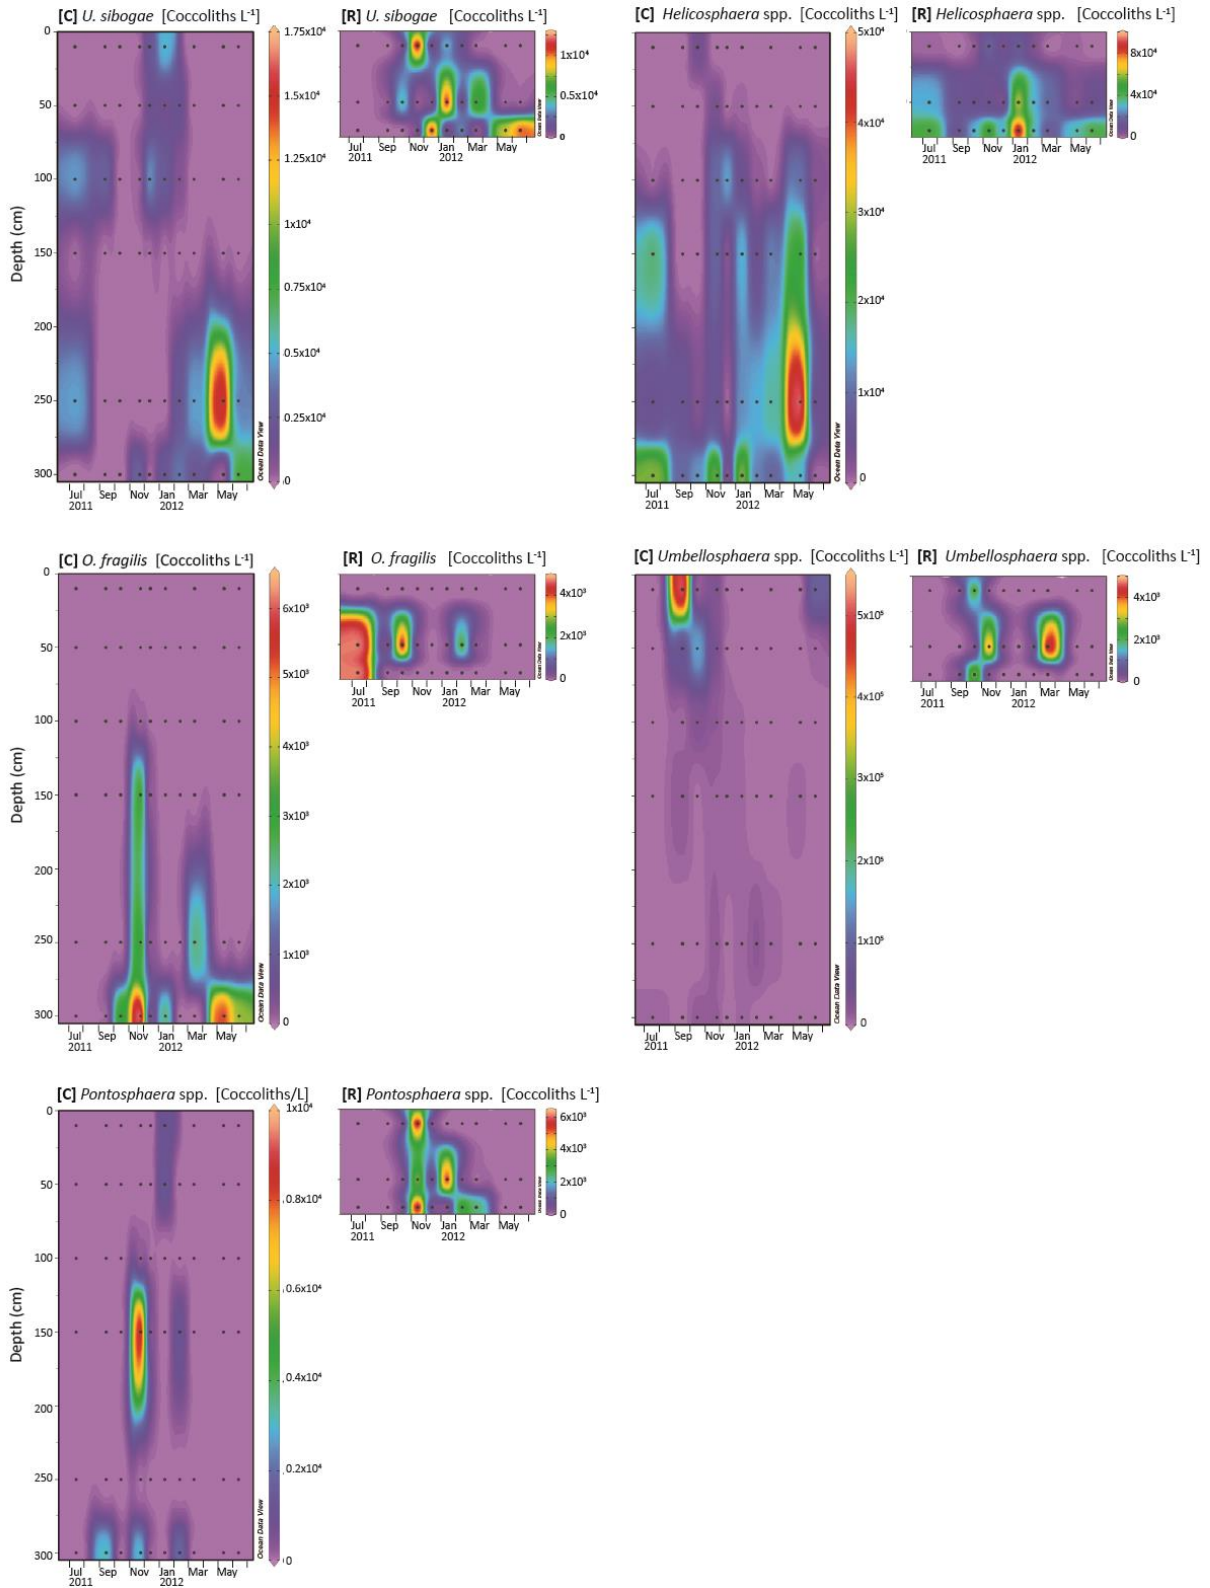

Figure S4. Temporal and vertical variability of the absolute abundance of minor species of coccoliths (coccoliths  $L^{-1}$ ) as in Figure S1.
